# Supplementary material for: Variation in herbivore space use: comparing two savanna ecosystems with different anthrax outbreak patterns in southern Africa
Source: Mov Ecol. 2023 Jul 31;11:46. doi: 10.1186/s40462-023-00385-2 (PMC10392021; doi:10.1186/s40462-023-00385-2)

## Supplementary Figures

**Figure S1.** Overall spatial distribution of anthrax mortalities by species from **a)** 1996 – 2014 in Etosha National Park, Namibia and **b)** 1990 – 2015 in Kruger National Park, South Africa.

Anthrax mortality data used for this figure included only cases with coordinates.

**Figure S2.** Spatial distribution of anthrax mortalities by year and species from **a)** 1996 – 2014 in Etosha National Park, Namibia and **b)** 1990 – 2015 in Kruger National Park, South Africa.

Anthrax mortality data used for this figure included only cases with coordinates and years with at least 10 cases.

**Figure S3.** First reading for each tracked individual from the telemetry data analyzed in this study. The study species included **a)** springbok, kudu, wildebeest, zebra and elephant in Etosha National Park, Namibia and **b)** impala, kudu, wildebeest, zebra, buffalo and elephant in Kruger National Park, South Africa. Some tracked individuals in Kruger sometimes went outside the park, but they still remained in the Greater Limpopo Transfrontier Park.

**Figure S4.** Net squared displacement (NSD) starting at the first location of the data for **a)** kudu in Etosha National Park, Namibia, **b)** kudu in Kruger National Park, South Africa, **c)** wildebeest in Etosha, **d)** wildebeest in Kruger, **e)** zebra in Etosha, **f)** zebra in Kruger, **g)** elephant in Etosha, **h)** elephant in Kruger, **i)** springbok in Etosha, **j)** impala in Kruger and **k)** buffalo in Kruger. NSD shown with y-axes is log-transformed post plus one.

**Figure S5.** Average NDVI (Normalized Difference Vegetation Index; a remote-sensing index of vegetation greenness or biomass) based on 95% herbivore individual ranges in Etosha National Park, Namibia and Kruger National Park, South Africa. Species are ordered along the x-axis based on increasing body mass, and sex of individuals is color-coded.

**Figure S6.** Effects of NDVI (Normalized Difference Vegetation Index; a remote-sensing index of vegetation greenness or biomass) on range size by herbivore species, estimated with a gamma generalized linear mixed model (Additional file 1: Supplementary Methods), shown with **a**) coefficients by species and **b**) predicted effects. The circles of plot **a** are means of the coefficients; the ranges are 95% confidence intervals. The lines of plot **b** are means of the effects; the shaded areas are 95% confidence intervals for prediction. Y-axis of plot **b** is log-transformed.

**Figure S7.** Relationships between estimated ranges by species, and **a**) herbivore body mass and **b**) feeding habits. Feeding habits are represented with C4 percentage as an index which reflects proportion of grass in a diet. Estimated ranges were predicted with a gamma generalized linear mixed model, using medians of NDVI (Normalized Difference Vegetation Index; a remote-sensing index of vegetation greenness or biomass) values from Etosha National Park, Namibia and Kruger National Park, South Africa (Additional file 1: Supplementary Methods). The circles and triangles are average predicted range size; the ranges are their 95% confidence intervals. The

lines of plot a are best fitting lines between body mass and range size, excluding springbok. Y-axes of both plots and x-axis of plot **a** are log-transformed. Information of C4 percentages in diets and body mass was retrieved from literature and summarized in Additional file 2: Table S5.

**Figure S8.** Relationships between effects of NDVI (Normalized Difference Vegetation Index; a remote-sensing index of vegetation greenness or biomass) on range sizes by species estimated with a gamma generalized linear mixed model (Additional file 1: Supplementary Methods), and **a)** herbivore body mass and **b)** feeding habits. Feeding habits are represented with C4 percentage as an index which reflects proportion of grass in a diet. The circles are means of the coefficients; the ranges are their 95% confidence intervals. X-axis of plot **a** is log-transformed. Information of C4 percentages in diets and body mass was retrieved from literature and summarized in Additional file 2: Table S5.

**Figure S9.** Average proportion of overlap of 95% range from one month to the next by season for individual herbivores in Etosha National Park, Namibia and Kruger National Park, South Africa. An individual-season was removed from range overlap estimation if there were fewer than three pairs of consecutive months. Species are ordered along the x-axis based on increasing body mass, and sex of individuals is color-coded.

**Figure S10.** Simulated residuals generated with R package DHARMA by Etosha and Kruger National Parks from the gamma generalized linear mixed model (Additional file 1:

Supplementary Methods). The values of DHARMA residuals represent the proportion of simulated residuals lower than the residuals from the model.

Figure S1

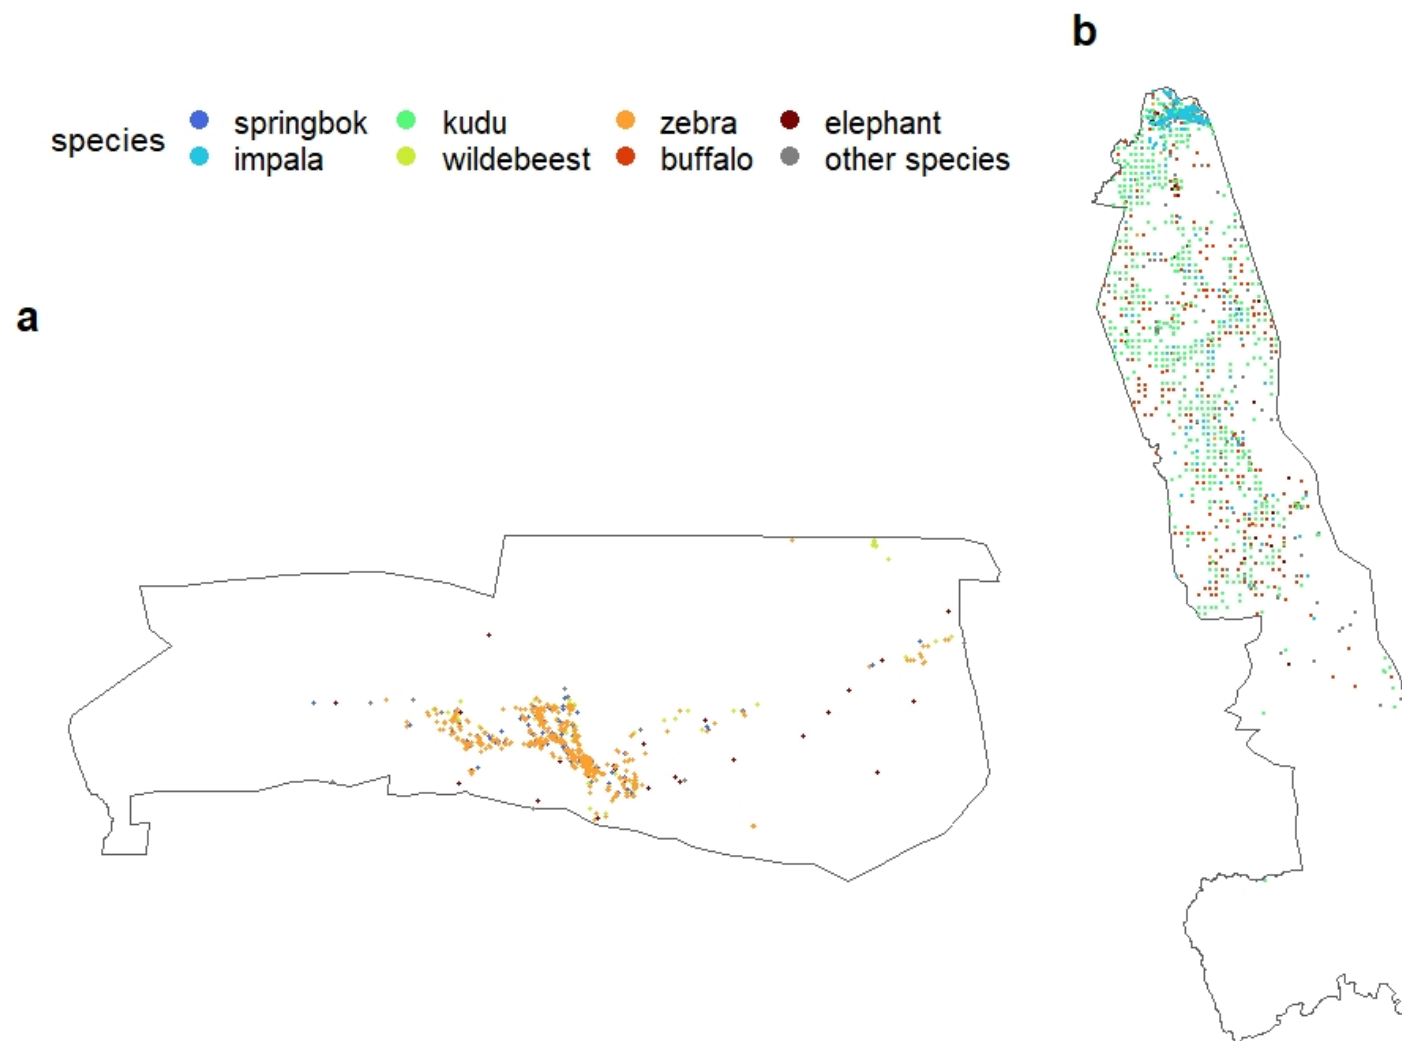

Figure S2

species    ● springbok    ● kudu    ● zebra    ● elephant  
                 ● impala    ● wildebeest    ● buffalo    ● other species

**a**

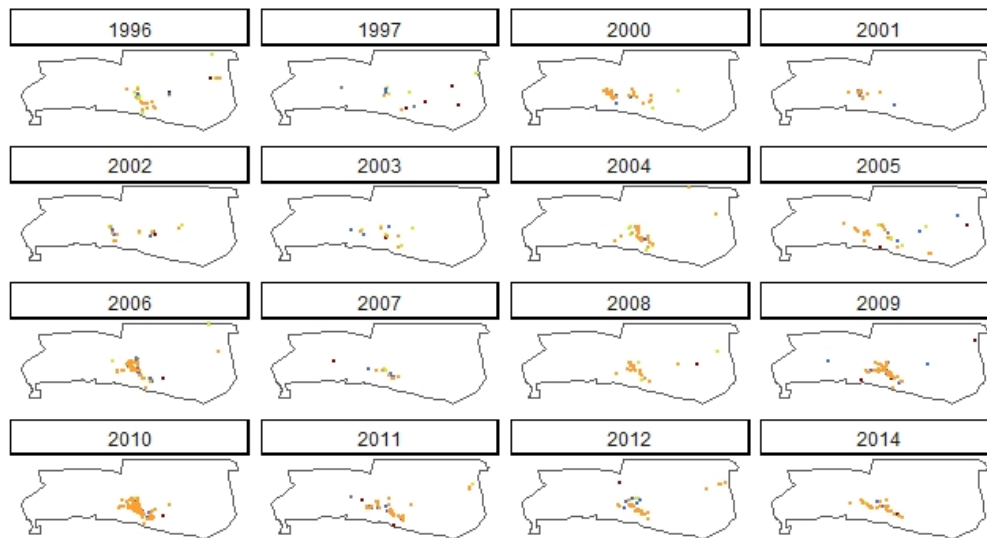

**b**

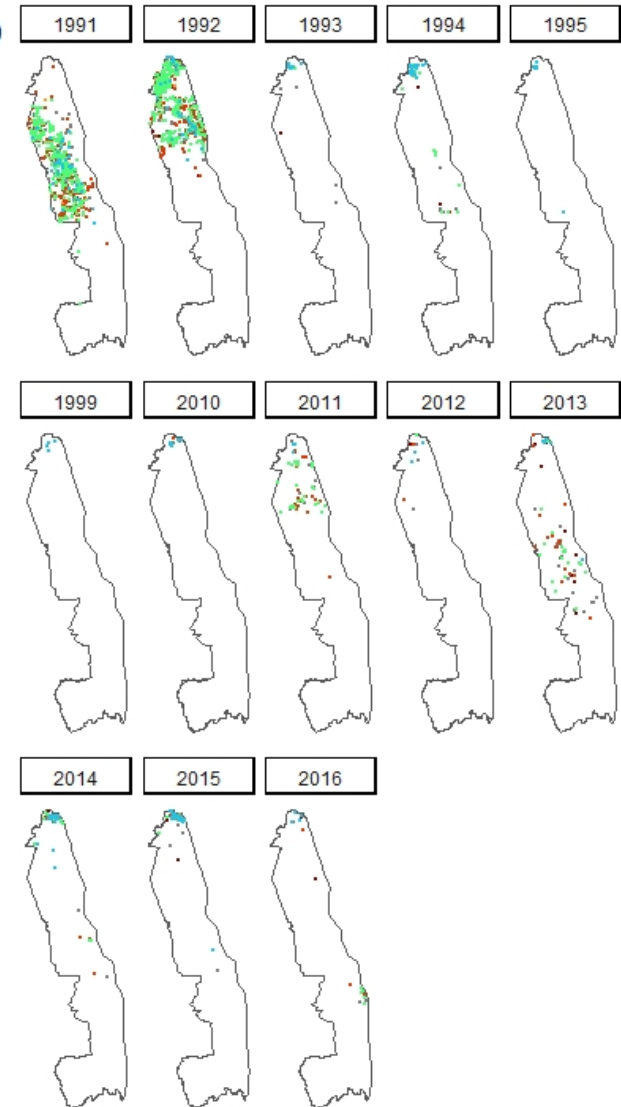

Figure S3

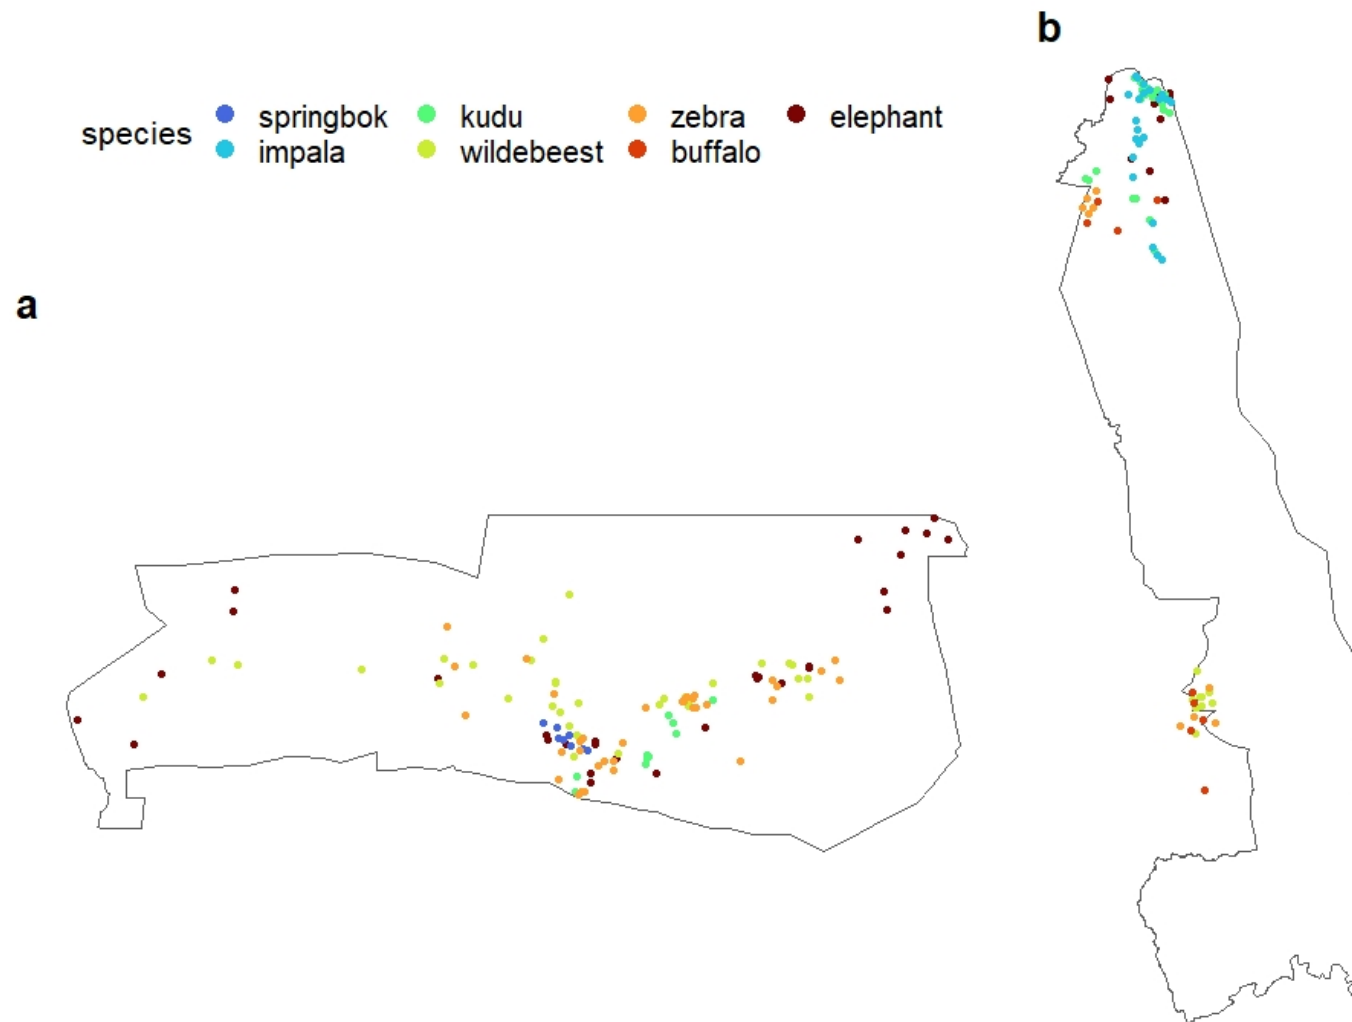

**Figure S4**

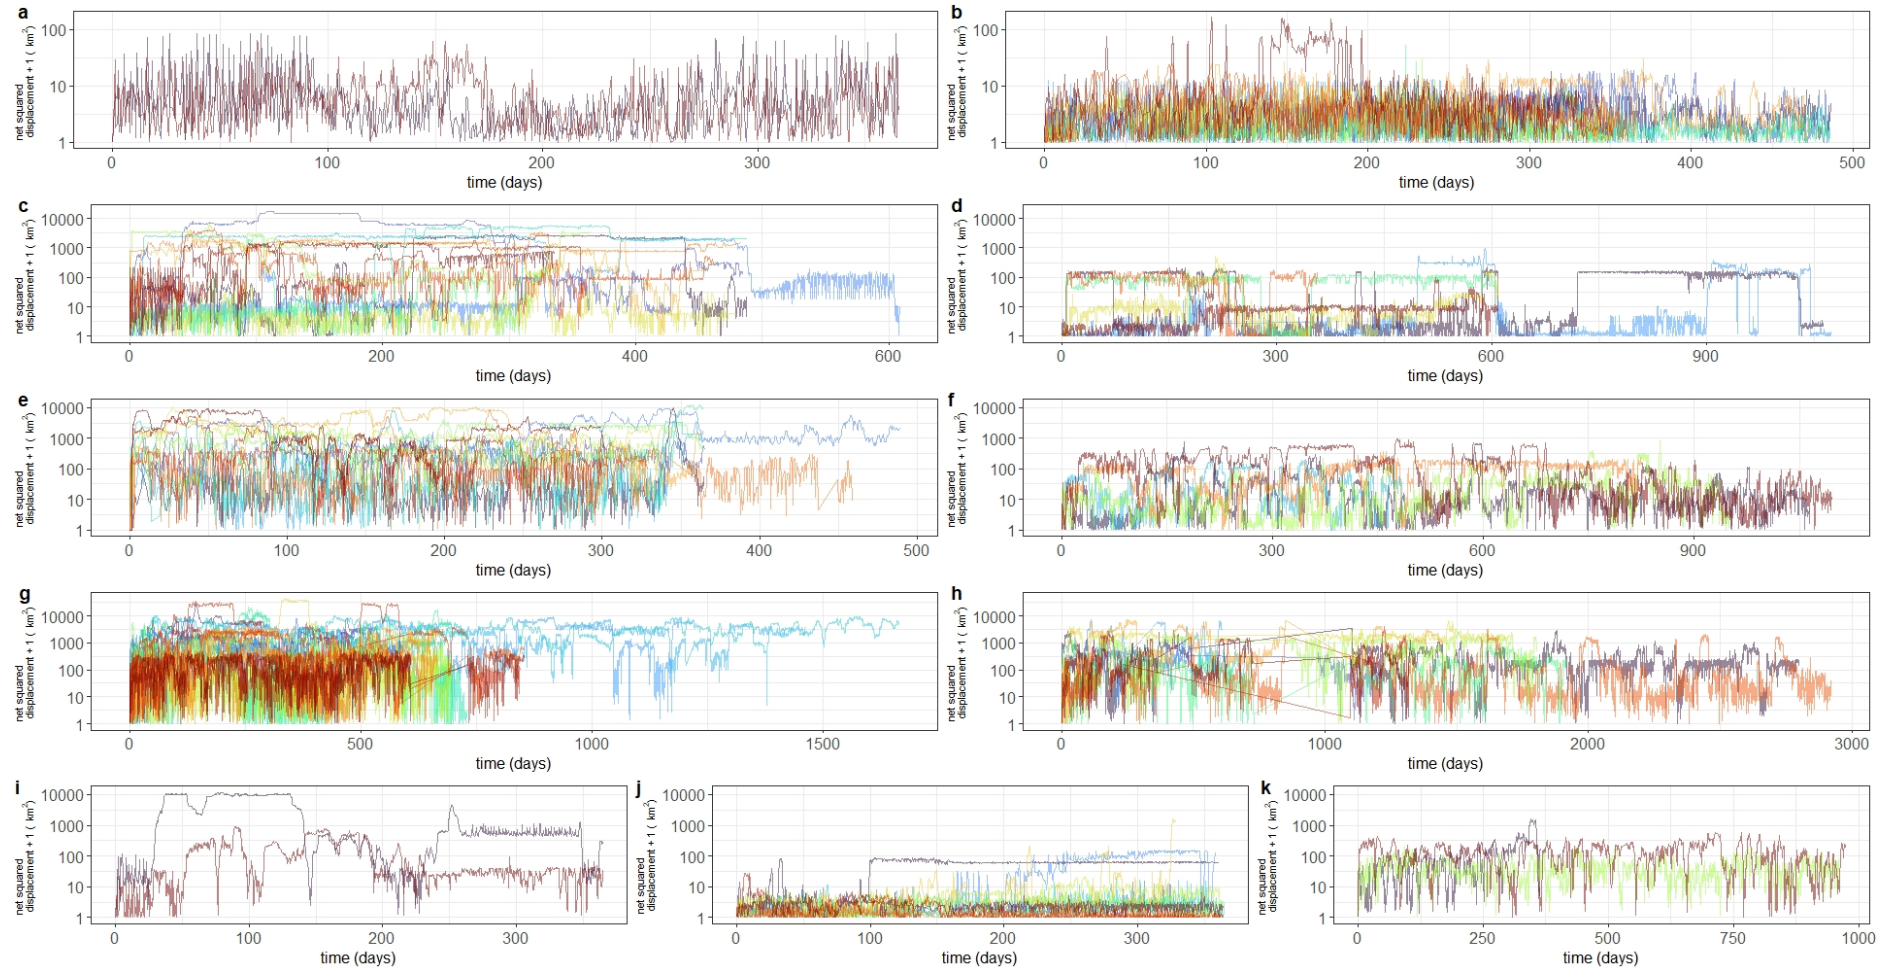

Figure S5

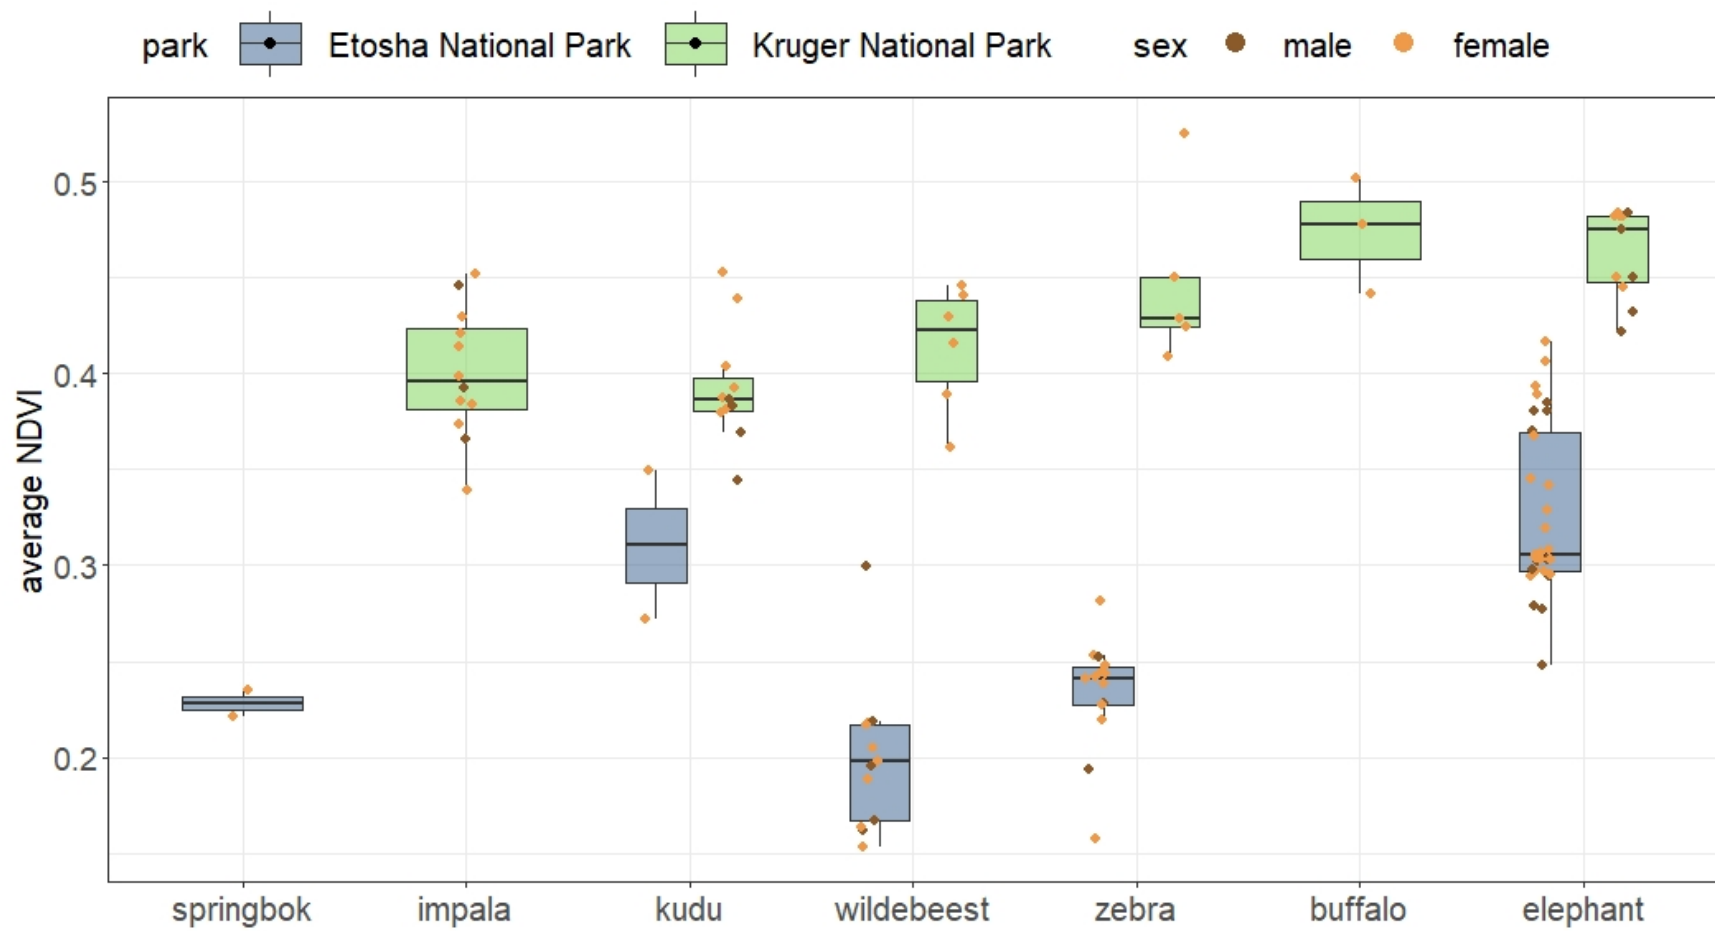

Figure S6

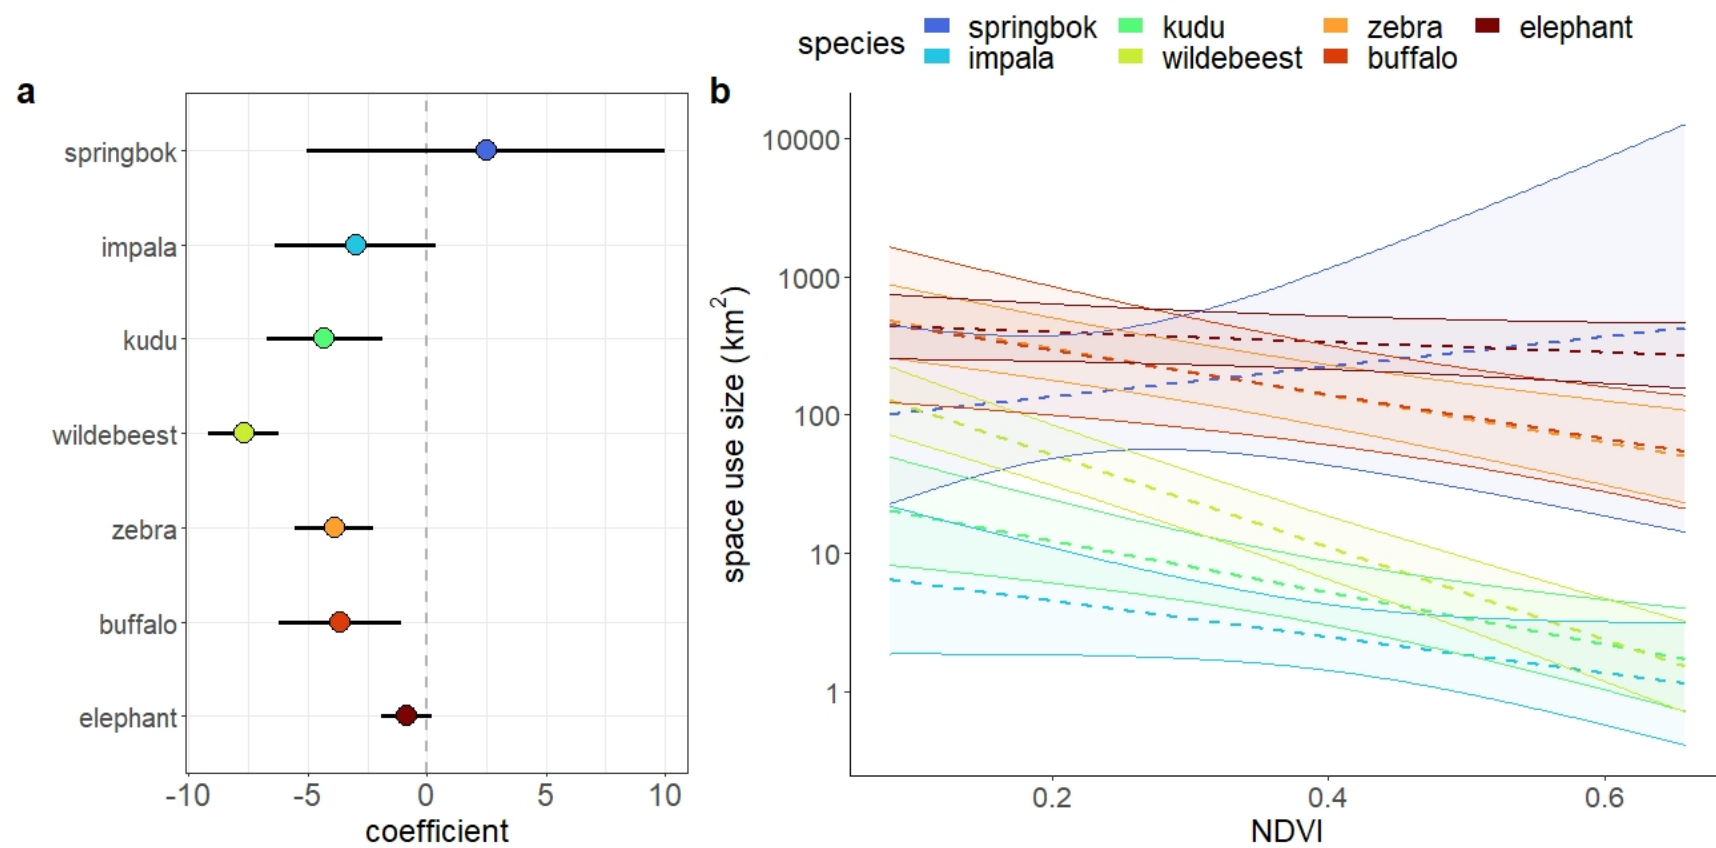

Figure S7

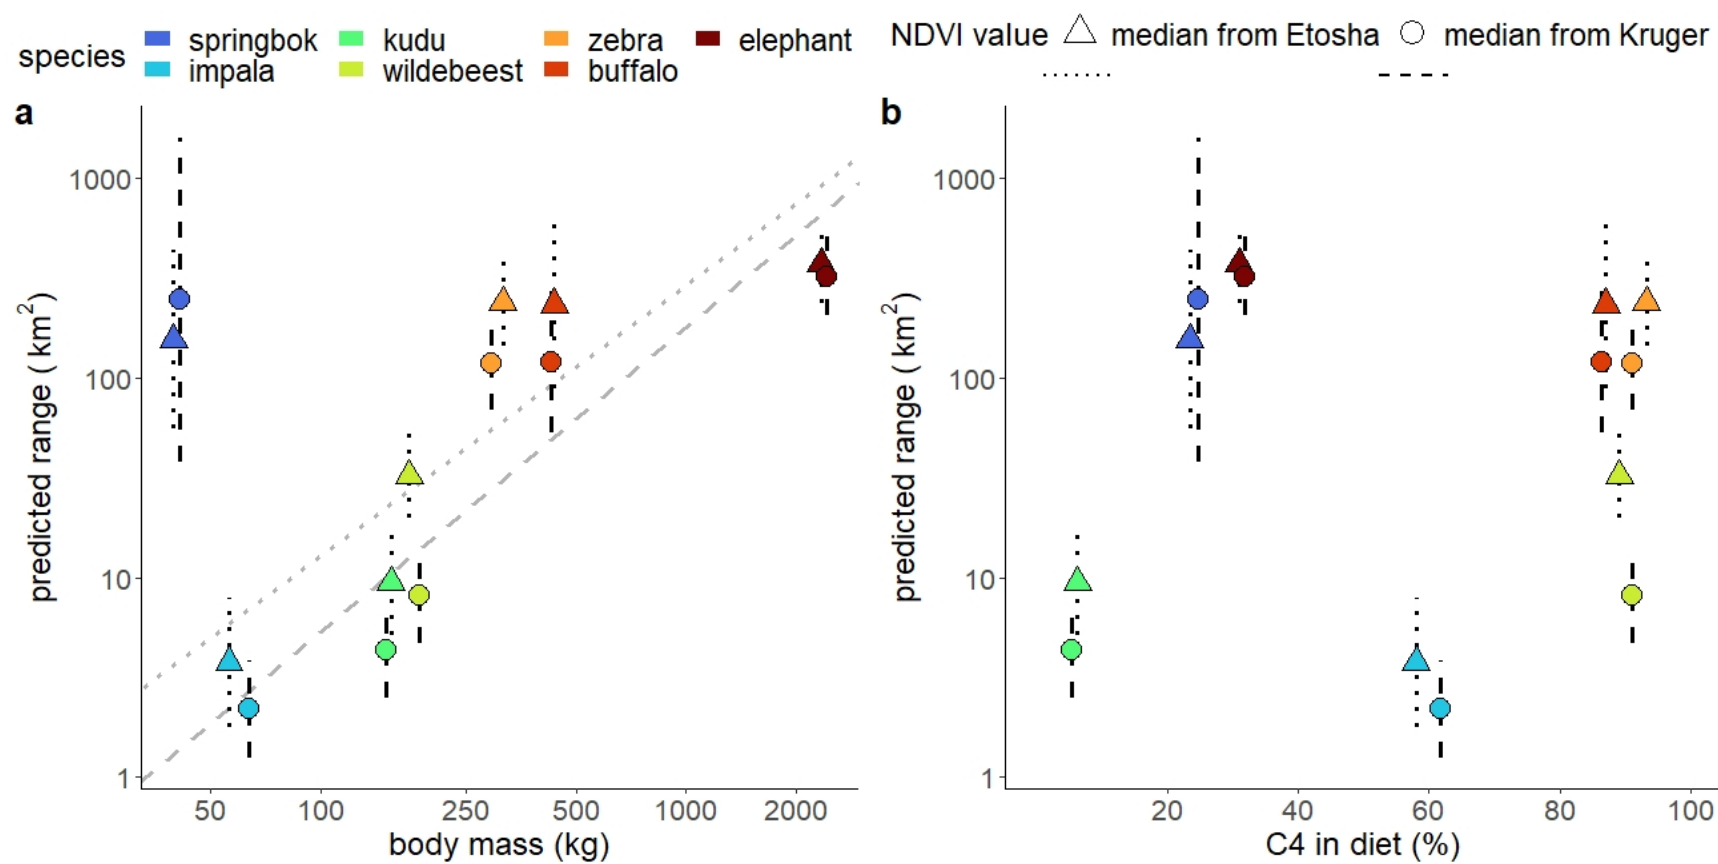

Figure S8

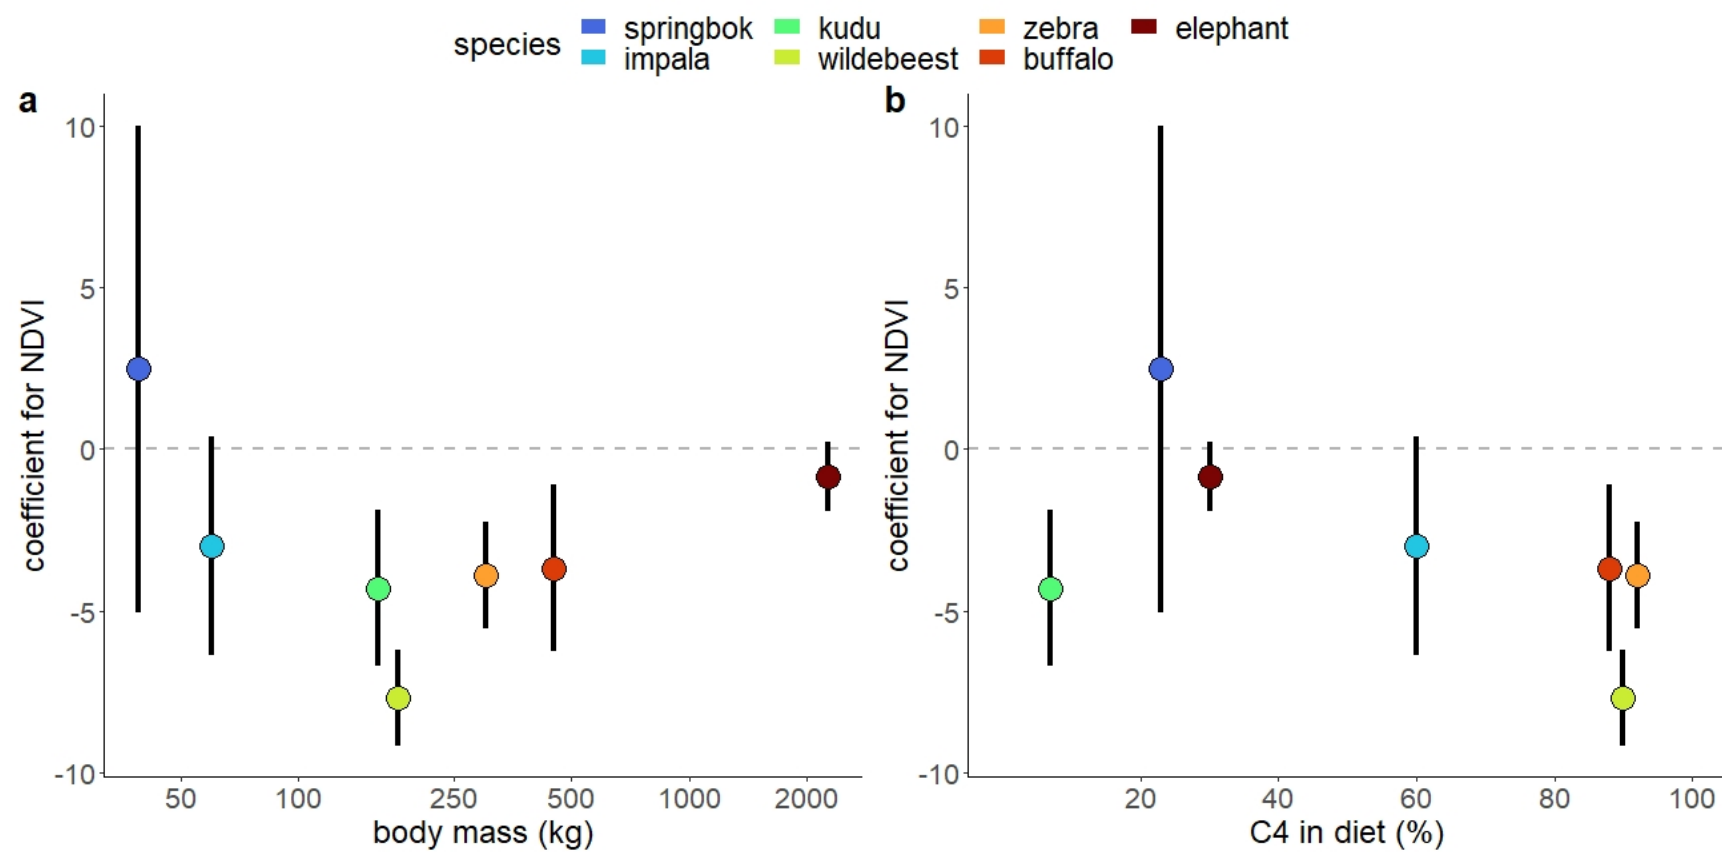

Figure S9

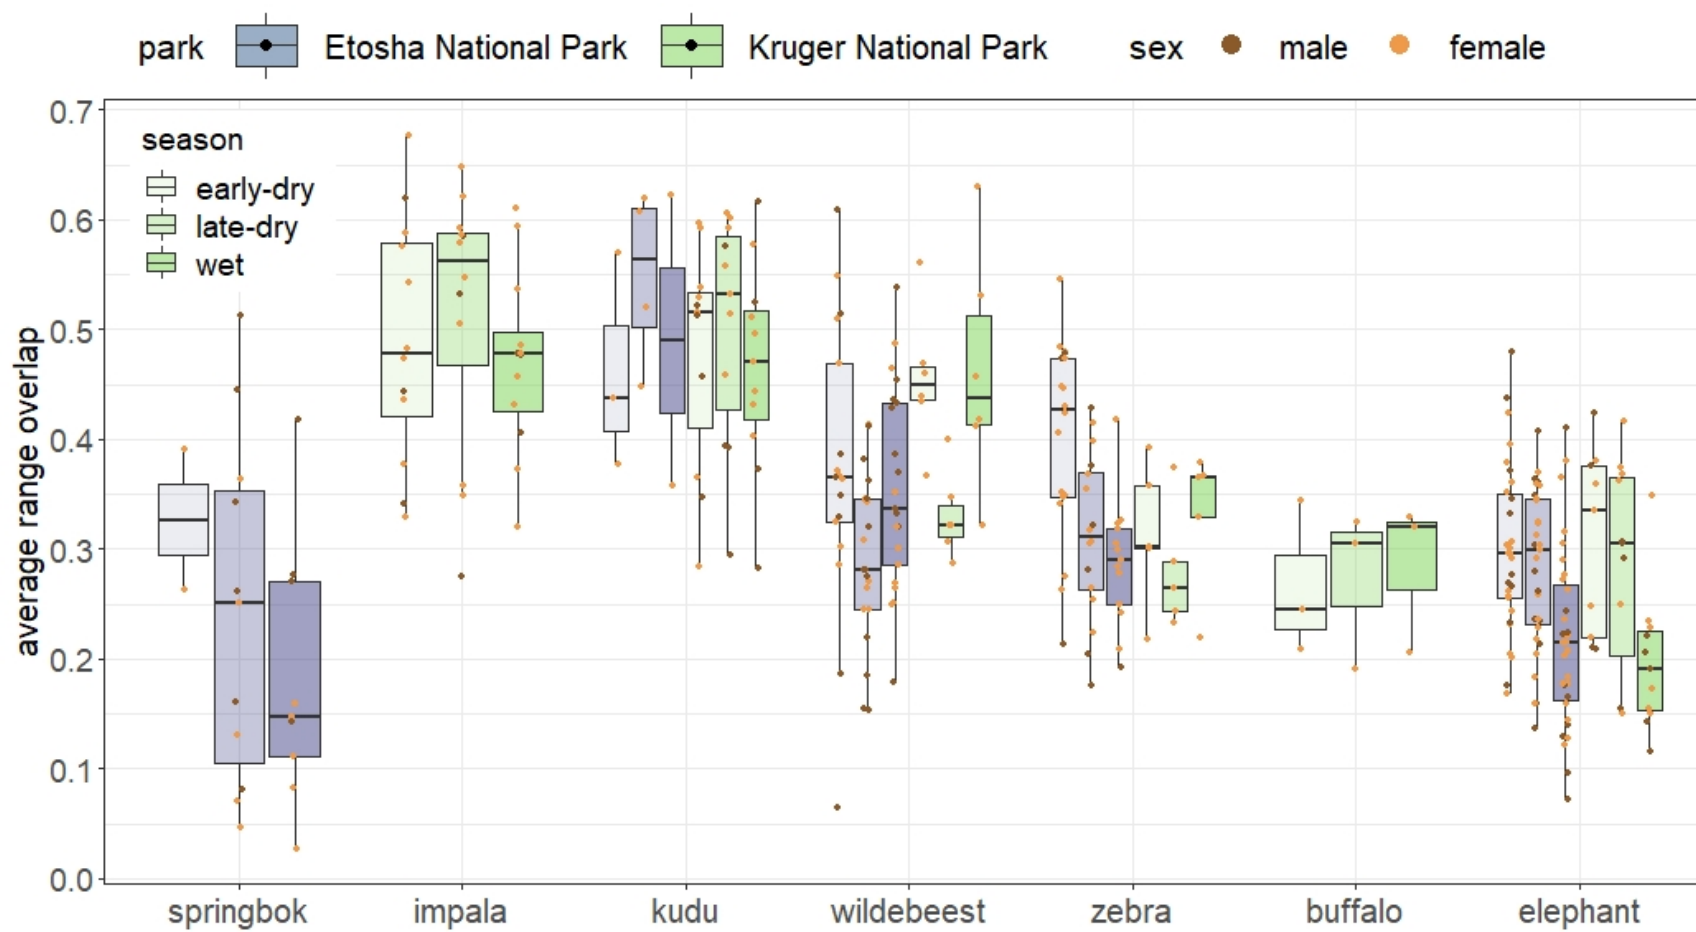

**Figure S10**

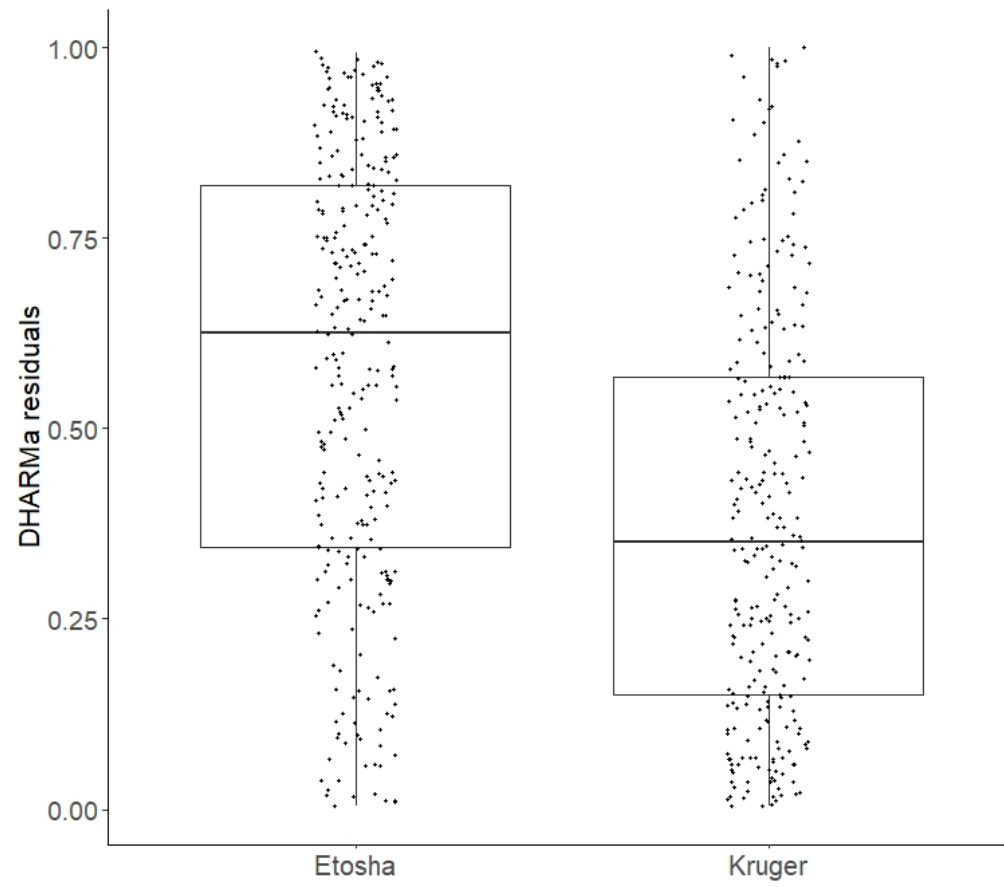

Supplement: Supplementary file 3 — Supplementary Material 3 [file 40462_2023_385_MOESM3_ESM.pdf]
